# Supplementary material for: Lack of Globulin Synthesis during Seed Development Alters Accumulation of Seed Storage Proteins in Rice
Source: Int J Mol Sci. 2015 Jun 30;16(7):14717–36. doi: 10.3390/ijms160714717 (PMC4519868; doi:10.3390/ijms160714717)
Supplement: Supplementary file 1 [file ijms-16-14717-s001.pdf]

## Supplementary Information

**Table S1.** Primer list used in this study.

| Target Gene                          | Primer Name      | Forward Primer               | Reverse Primer              | GenBank  |
|--------------------------------------|------------------|------------------------------|-----------------------------|----------|
| Globulin                             | <i>pANDA-Glb</i> | AAAAAGCAGGCTGAGAGGTTCCAGCCGA | AGAAAGCTGGGTCTCGCCCTGGTCAGC | GQ848069 |
|                                      | <i>Glb</i>       | AGTCGGAGATGAGGTTTCAGG        | GAACATCGGCTGGAACCTC         |          |
| Prolamin 10 kDa                      | <i>10</i>        | TTATTTGTGCTGGACTCGGG         | GAGAGTTGGAAGTTGACAGGG       | EF122448 |
| Prolamin 13 kDa-I                    | <i>13 I</i>      | CAACTACAGTCGCATCTCCTAC       | GGGTTGCCACTATGCTATACTG      | EF122447 |
| Prolamin 13 kDa-IIa                  | <i>13 IIa</i>    | GCTCTGTTGGCTTTTAACGTG        | ACTCATTACAAGACACCGCC        | GU120358 |
| Prolamin 13 kDa-III                  | <i>13 III</i>    | TCACCCGTGTTTCAACTGAG         | CACAATAGCCTGAACACTGC        | FJ940200 |
| Prolamin 16 kDa                      | <i>16</i>        | CTCAATTTGCCCTCCATGTG         | AGAACCGCAATGACCAGTAG        | EF122449 |
| Glutelin A                           | <i>GluA</i>      | AATGATGGTGAAGTGCCGGT         | TCACGCCTGTATGCTTGAGG        | EF122456 |
| Glutelin B                           | <i>GluB</i>      | ATTGAGCAAACTCTGGGCA          | TGGCTCTGTAGCCTCTTTGC        | EF122460 |
| Glutelin C                           | <i>GluC</i>      | CACAAGGGCCAATAGCCAGA         | GGTCACGTACATCACCGTGT        | EF122465 |
| Glutelin D                           | <i>GluD</i>      | AAGACAGAGCGACCAAGCTC         | ATGTGCAAACTAGCCGGAA         | EF122464 |
| Binding protein                      | <i>BiP</i>       | AGGACATCAGCAAGGACAAC         | GGACTCAATCTCAACACGGAC       | AK065743 |
| Protein disulfide isomerase like 1;1 | <i>PDIL1;1</i>   | AACGATGTGCCAAGCGAGTTCGAT     | TTAGAGCTCATCCTTGAGAGGCTC    | AB373950 |
| GTP-binding protein Sar1a            | <i>Sar1a</i>     | AGTGTTGTCCGCAAGATGGG         | CGCTGGGCAGAGTATGCAAG        | AK112012 |
| GTP-binding protein Sar1b            | <i>Sar1b</i>     | GCAAGATGGGCTATGGGGA          | TGGTAAGGTGAAACAGGAGTATGAAC  | AK099149 |
| GTP-binding protein Sar1c            | <i>Sar1c</i>     | GCGTCGTCCGCAAGATG            | AGGAGAGTTGATAAACAGAACCAGAG  | AK119548 |
| Calnexin                             | <i>CNX</i>       | TCGACAACCCCAACTACAAAG        | ATCTCAATCCCAATAGCGGC        | AK069118 |
| Protein disulfide isomerase like 2;3 | <i>PDIL2;3</i>   | ATAAGAGGATTTCCAACATTAAG      | TGCTCCTTGATAATCTACTG        | AP005559 |

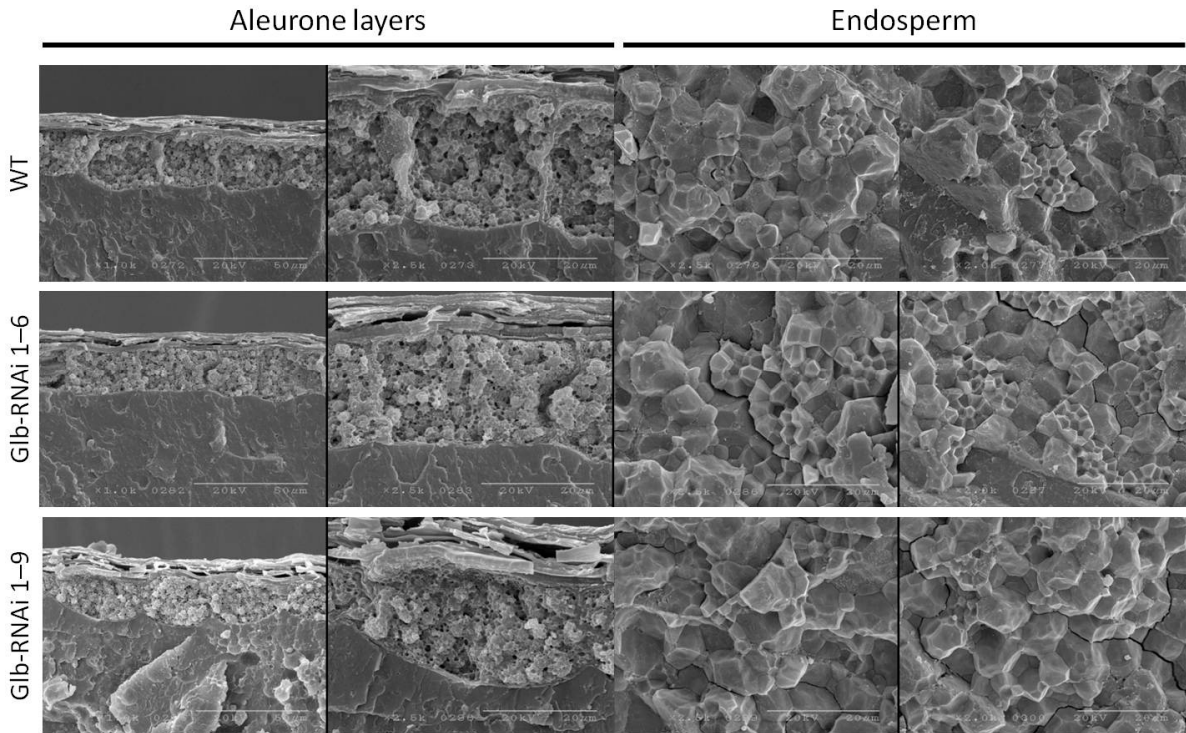

**Figure S1.** Phenotype analysis of seed endosperm by scanning electron microscopy. Seeds were transversely sectioned using a sharp knife and prepared on a specimen slice. Aleurone layers as well as starch granules were observed in wild type (WT) and Glb-RNAi lines. Comparative analysis of endosperm morphology indicates no significant differences between wild type and transformants.

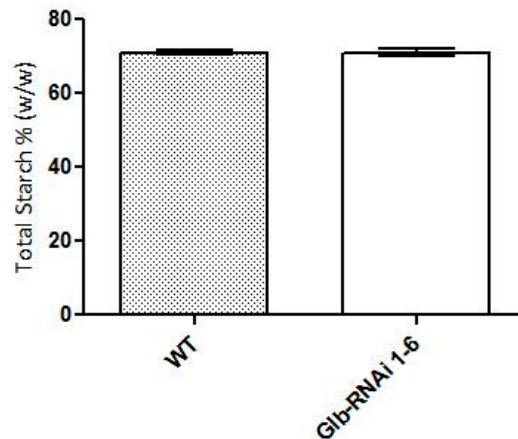

**Figure S2.** Measurement of starch content in wild type (WT) and Glb-RNAi line. An equal amount (100 mg) of seed powder was prepared from WT and Glb-RNAi 1-6. Total starch measurement was performed using TOTAL STARCH Kit, as described by the manufacturer (Megazyme). This analysis indicates that starch content was similar between the wild type ( $71.059 \pm 0.944$ ) and Glb-RNAi 1-6 lines ( $71.004 \pm 1.959$ ).

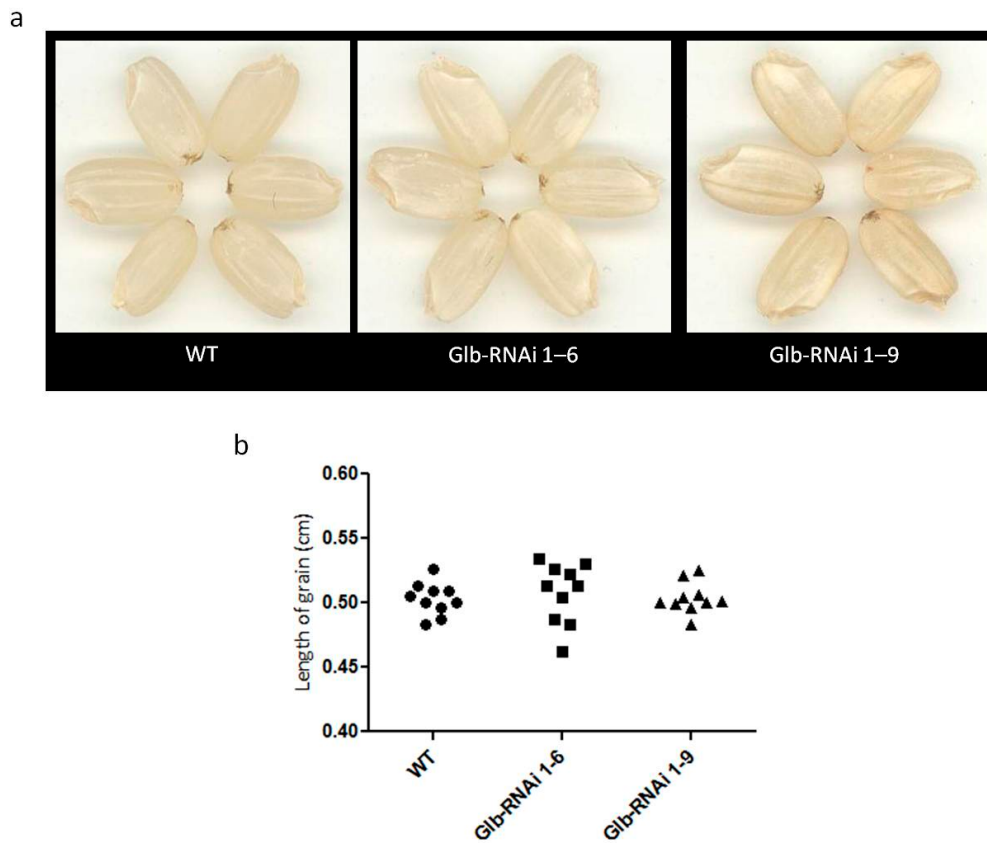

**Figure S3.** Phenotypic analysis of seed growth. (a) The photos indicate comparative grain sizes for the wild type (WT) and Glb-RNAi transformants; (b) Ten seeds were randomly selected from the WT and Glb-RNAi lines, and grain size was measured using ImageJ.

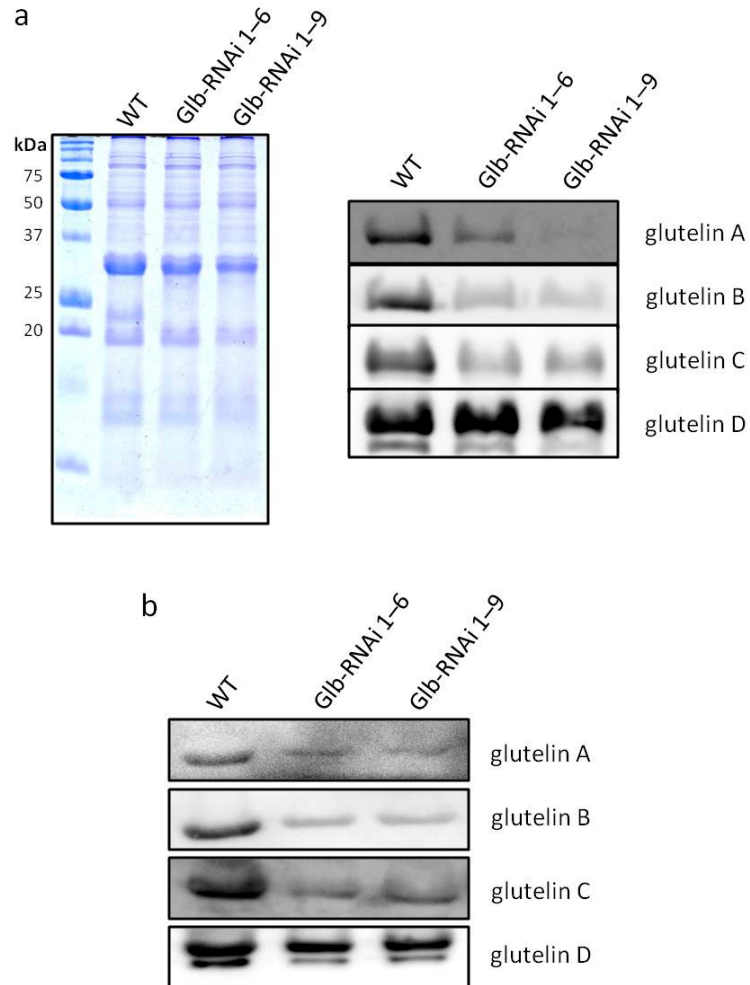

**Figure S4.** Immunoblotting analyses using anti-glutelin antibodies. **(a)** Total protein was extracted from one seed which was selected at random from both wild type (WT) and Glb-RNAi lines. Proteins were loaded onto SDS-PAGE and further transferred onto PVDF membranes. These membranes were incubated with diverse anti-glutelin antibodies. The signal was detected and recorded by a luminescent image analyzer (LAS-4000, Fujifilm); **(b)** Proteins used in this analysis were isolated from dry seeds of T<sub>1</sub> generation of WT and Glb-RNAi transformants. The experiment process was identical to the method described previously.
